# Supplementary figures and images for: Attention increases neural selectivity in the human lateral occipital complex
Source: Springer Nature journal article supplement (doi:10.1038/nn1161), 2003-11-30

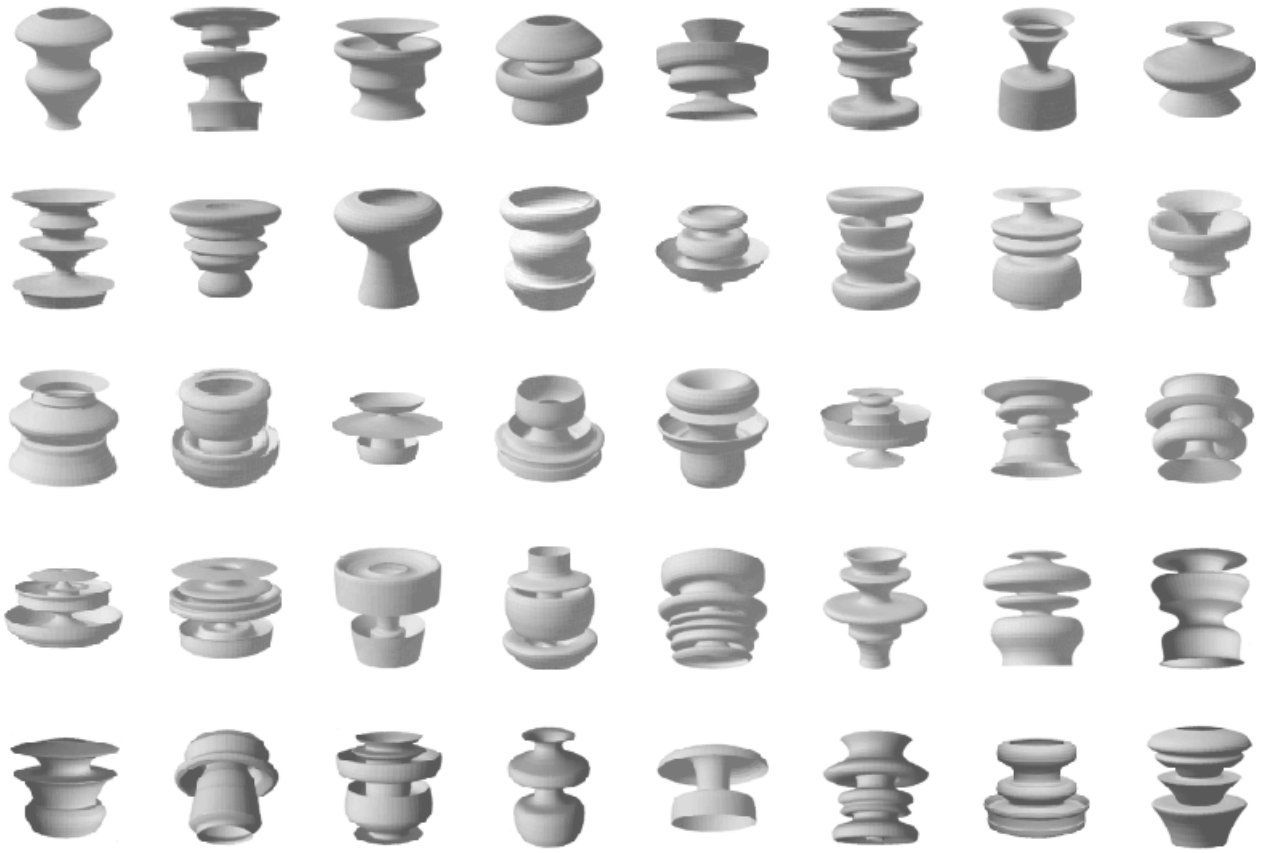

Supplement: nn1161-S1.pdf [file nn1161-S1.pdf]
